# Supplementary material
Source: HighWire-hosted journal article supplement (https://cmaj.ca/highwire/filestream/77077/field_highwire_adjunct_files/0/190777-guide-1-at.pdf)
Supplement: 190777-guide-1-at.pdf [file 190777-guide-1-at.pdf]

**Appendix 1 (as supplied by the authors): Health system helplines, social services and take home naloxone (THN) resources**

| Provinces and Territories                                                                                                                                                                                                                                                                                         | Helpline for non-emergent health problems                              | Social services helpline-Toll free                | Availability of free Take-Home Naloxone (THN) kits for opioid overdose and patient training                                                                                                                                         |
|-------------------------------------------------------------------------------------------------------------------------------------------------------------------------------------------------------------------------------------------------------------------------------------------------------------------|------------------------------------------------------------------------|---------------------------------------------------|-------------------------------------------------------------------------------------------------------------------------------------------------------------------------------------------------------------------------------------|
| <p><b>List of Supervised Injection Sites Canada:</b><br/> <a href="https://www.canada.ca/en/health-canada/services/substance-use/supervised-consumption-sites/status-application.html">https://www.canada.ca/en/health-canada/services/substance-use/supervised-consumption-sites/status-application.html</a></p> |                                                                        |                                                   |                                                                                                                                                                                                                                     |
| Alberta                                                                                                                                                                                                                                                                                                           | Health link 811                                                        | 211<br>311                                        | <ul style="list-style-type: none"> <li>-Free THN kits available in many pharmacies</li> <li>-Participating pharmacist must be trained</li> <li>-A pharmacist conducts patient assessment and education</li> </ul>                   |
| British Columbia                                                                                                                                                                                                                                                                                                  | Health Link BC 811 or 711 TTY                                          | 211<br>311<br>604-875-6431<br>604-875-0885<br>TTY | <ul style="list-style-type: none"> <li>-Free THN available restricted to very few pharmacies and treatment centers</li> <li>-Pharmacists are trained</li> <li>-Patient training by dispensing pharmacist is mandatory</li> </ul>    |
| Manitoba                                                                                                                                                                                                                                                                                                          | Health Links Info-santé 1-888-315-9257 Toll free 204-788-8200 Winnipeg | 211<br>311<br>877-311-4974<br>204-986-4974<br>TTY | <ul style="list-style-type: none"> <li>-Free THN available in street connection and very few pharmacies</li> <li>-All pharmacists are trained</li> <li>-Pharmacists assess and train all patients on the use of naloxone</li> </ul> |
| New Brunswick                                                                                                                                                                                                                                                                                                     | Tele-care Tele-soins 811 1-866-213-7920 TTY                            | 211                                               | <ul style="list-style-type: none"> <li>-Free THN not available</li> <li>-Insufficient information on pharmacist and patient training</li> </ul>                                                                                     |

|                           |                                                               |                                        |                                                                                                  |
|---------------------------|---------------------------------------------------------------|----------------------------------------|--------------------------------------------------------------------------------------------------|
| Newfoundland and Labrador | Health Line<br>811<br>1-888-709-2929<br>1-888-709-3555<br>TTY | Insufficient information               | -Free THN available in naloxone distribution sites<br>-Patients and pharmacists receive training |
| Nova Scotia               | Health line<br>811<br>711 TTY                                 | 211<br>311<br>1-855-466-4994 Toll free | -Free THN available<br>-Pharmacists and patients receive training                                |
| Ontario                   | Telehealth Ontario<br>1-866-797-0000<br>1-866-797-0007<br>TTY | 211<br>311                             | -Free THN available<br>-Pharmacists and patients receive training                                |
| Prince Edward Island      | Telehealth<br>811<br>711 TTY                                  | 211<br>311                             | -Free THN not available<br>-No systematic training for pharmacists<br>-Patients are trained      |
| Quebec                    | Info-sante or health information line<br>811                  | 211<br>311                             | -Free THN available<br>-Pharmacist and patient training information insufficient                 |
| Saskatchewan              | Health line<br>811                                            | 211<br>306-777-7000                    | - Free THN available<br>- Pharmacists and patients receive training                              |
| Nunavut                   | Nunavut Kamatsiaqkut Help line:<br>1-800-265-3333             | 211                                    | - Free THN available<br>- Pharmacists and patients receive training                              |

|                       |                                                         |                          |                                                                                                            |
|-----------------------|---------------------------------------------------------|--------------------------|------------------------------------------------------------------------------------------------------------|
| Yukon                 | Yukon Health line 811                                   | 211                      | - Free THN available<br>- Pharmacists and patients receive training                                        |
| Northwest Territories | Telecare NWT<br>1-800-265-3333<br>1-888-255-8211<br>TTY | Insufficient information | - Only intranasal naloxone is available through THN program<br>- Pharmacists and patients receive training |
